# Supplementary material
Source: PubMed Central journal article supplement (PMC1892924)
Supplement: pnas_0611008104_3.pdf [file pnas_0611008104_3.pdf]

# *X. laevis* GHRH

1 aatttcgcag accctccggc tgtaaggatt ctacagcttt ggaagcagc  
51 ccattgtaga ggaagaagtt cagcaggact gactacacag tttttactgc  
M R R T L C L L L L H F A  
101 aaaaaaagaa ggATGCGCAG AACACTTTGC CTGTTGCTAC TCCATTTTGC  
L C V Q C Y I F H P K Y S S Y Q  
151 ATTATGTGTG CAGTGTTACA TCTTTCATCC AAAATACAGT TCTTACCAGA  
T P G D F N I E T I E P L Q S Q D  
201 CTCCAGGCGA CTTTAATATC GAGACAATTG AGCCCTTGCA AAGCCAAGAC  
W S S L D E K K E Y V R G L S E N  
251 TGGTCATCTT TGGATGAGAA AAAGGAATAT GTCAGGGGAC TGTCAGAAAA  
R V E **R** **H V D A I F T N T Y R K**  
301 CAGGGTGGAA CGGCATGTGG ATGCCATATT CACTAACACA TACAGAAAAAT  
**F L G Q I S A R R Y L Q N M M** **G K**  
351 TCCTGGGGCA GATTTTCAGCC AGGAGGTACC TGCAGAACAT GATGGGGAAA  
**T** L G Q D T Q **K K** A D P E D G V L  
401 ACCCTGGGGC AGGATACCCA GAAAAAGGCA GATCCTGAAG ATGGTGTGCT  
G E E V I T L L S D S G I P D W  
451 GGGGGAAGAA GTGATCACCC TACTGAGTGA CAGTGGGATT CCAGATTGGA  
R A E E H R E T R L \*  
501 GGGCAGAAGA GCACCGTGAG ACCCGGCTAT AAactagaag cctacaggat  
551 ccgtcatcaa atgttcagcc taatgcgтта attccgtgcc aacaaaatgg  
601 acagcaatgg caacatacat gatagagcat tggtcattgt gatttctgag  
651 ttggtaataa aatataacat tatggggcaa aaaaaactag gtcaagtttt  
701 atgccaattc cctgttgaga aaaatcactt tttgcatcta atcaagaagc  
751 agttgtacag aggtatttca taaaataaaa agtttttagtg
