# Supplementary material
Source: PubMed Central journal article supplement (PMC1892924)
Supplement: pnas_0611008104_12.pdf [file pnas_0611008104_12.pdf]

| Amplification    | Primer Name     | Primer Sequence (5' to 3')                              |
|------------------|-----------------|---------------------------------------------------------|
| Goldfish GHRH    |                 |                                                         |
| 3' RACE          | FishGHRH-F1     | GACTCGAGCAYGCGYATGCCATCTTTAC                            |
|                  | FishGHRH-F2     | GACTCGAGCTKGGTCAAATRTCWGCCAG                            |
| 5' RACE          | FishGHRH-R1     | GAAAGCTTTGTAGCTGTTKGTAAAGATG                            |
|                  | FishGHRH-R2     | GAAAGCTTCA YTGWAGA AWYTYCTGGC                           |
| Full length      | gfGHRH-F4       | CAGCTCGAGGAATGAAACCAAACCCTGAG                           |
|                  | gfGHRH-R3       | CAGAAGCTTGTTCCAGTTTATFGACT                              |
| Zebrafish GHRH   |                 |                                                         |
| 3' RACE          | FishGHRH-F1     | GACTCGAGCAYGCGYATGCCATCTTTAC                            |
|                  | FishGHRH-F2     | GACTCGAGCTKGGTCAAATRTCWGCCAG                            |
| 5' RACE          | FishGHRH-R1     | GAAAGCTTTGTAGCTGTTKGTAAAGATG                            |
|                  | FishGHRH-R2     | GAAAGCTTCA YTGWAGA AWYTYCTGGC                           |
| Full length      | zfGHRH-F4       | CAGCTCGAGAACTGCCTTGCTAGTGCT                             |
|                  | zfGHRH-R3       | CAGAAGCTTCAGCAAATGCAATAGTTCC                            |
| Xenopus GHRH     |                 |                                                         |
| PARTIAL          | xGHRH-F1        | ATGCGAAGAACACTTTGCG                                     |
|                  | xGHRH-F2        | ATGTGGATGCCATATTCA                                      |
|                  | xGHRH-R1        | TCATAGCCGTGTTCCACG                                      |
| 3' RACE          | xGHRH-F3        | TTCCTGGGGCAGATTTTCAGC                                   |
|                  | xGHRH-F2        | ATGTGGATGCCATATTCA                                      |
| 5' RACE          | xGHRH-R2        | TCTTCTGCCCTCCAATCTGG                                    |
|                  | xGHRH-R3        | GCTGAAATCTGCCCCAGGAA                                    |
| Full length      | xGHRH-FLF1      | CCCCAAGCTTGGGAAGCACGCCATTGTAG                           |
|                  | xGHRH-FLR1      | CGGAATTCATTGCTGTCCATTTTGTG                              |
| Goldfish GHRH-R  |                 |                                                         |
| 3' RACE          | Fish-GHRH-R-mF3 | CAGCTCGAGGARWWKMTSTTTCAGCTGG                            |
|                  | Fish GHRH-R-mF1 | TTCGGCACTCATTACATG                                      |
| 5' RACE          | gf-GHRH-R-mR3   | ATGATCCACCAATAAG                                        |
|                  | gf-GHRH-R-mR5   | GGCTTCAACCAGCAAC                                        |
| 5' RACE          | gf-GHRH-R-mR4   | CAGCTCGAGATCCAGAGGACAATGC                               |
|                  | gf-GHRH-R-mR7   | CTGTGTGTTCTTGAAGAGA                                     |
| Partial clone    | Fish-GHRH-R-mF2 | CAGCTCGAGCCGYCSTACGAGGAAGC                              |
|                  | gf-mGHRH-R-R2   | CAGAAGCTTCCAACAGGGACGACAATG                             |
|                  | gf-mGHRH-R-F1   | CAGCTCGAGGCCTCATTGTGGCAGTTC                             |
|                  | gf-mGHRH-R-F6   | CAGAAGCTTAATACTGATGCTCTTC                               |
| Full length      | gf-mR-Start-F   | CAGCTCGAGTCGCGCGCGACCTG                                 |
|                  | gf-mR-Stop-R    | CAGAAGCTTAGAGGCACCGGTGAAT                               |
| Zebrafish GHRH-R |                 |                                                         |
| 3' RACE          | Fish-GHRH-R-mF3 | CAGCTCGAGGARWWKMTSTTTCAGCTGG                            |
|                  | Fish-GHRH-R-mF1 | TTCGGCACTCATTACATG                                      |
| 5' RACE          | Fish-GHRH-R-R2  | CAGAAGCTTAAMCCCTGGAAMGAGCCAG                            |
|                  | Fish-GHRH-R-mR1 | CAGAAGCTTTCTGGGYCTGCCACMTC                              |
| 5' RACE          | zf-mGHRH-R-R4   | CAGAAGCTTGTAACCGTATCTCATTC                              |
|                  | Fish-mGHRH-R-R5 | CAGAAGCTTGCACTTTAGGGATACCAGAG                           |
| 5' RACE          | Fish-mGHRH-R-R5 | CAGAAGCTTGCACTTTAGGGATACCAGAG                           |
|                  | zf-mGHRH-R-220R | ACCCACCACAGCACTGG                                       |
| Partial clone I  | zf-mGHRH-R-R5   | CAGAAGCTTGCACTTTAGGGATACCAGAG                           |
|                  | Fish-GHRH-R-F7  | CAGCTCGAGACASWGRRTGCTGGGAC                              |
| Partial clone II | Fish-GHRH-R-R2  | CAGAAGCTTAAMCCCTGGAAMGAGCCAG                            |
|                  | Fish-GHRH-R-F8  | CAGCTCGAGTTYGCCACKGTGAAGCTG                             |
| Full length      | zf-mGHRH-R-F4   | CAGCTCGAGTGTGGACTCGACTGG                                |
|                  | zf-mGHRH-R-R5   | CAGAAGCTTGCACTTTAGGGATACCAGAG                           |
| Others           |                 |                                                         |
| 5' & 3' RACE     | AUAP            | GGCCACGCGTCGACTAGTAC                                    |
| 3' RACE          | AP              | GGCCACGCGTCGACTAGTAC (T) <sub>17</sub>                  |
| 5' RACE          | AnP             | (CUA) <sub>4</sub> GGCCACGCGTCGACTAGTACGGGIIGGGIIGGGIIG |
